# Supplementary material
Source: PubMed Central journal article supplement (PMC8095384)
Supplement: jjaa230_suppl_supplementary_figure_s4.pdf [file jjaa230_suppl_supplementary_figure_s4.pdf]

# Supplementary Figure S4: Kaplan Meier Analysis in Crohn's Disease (CD) and Ulcerative colitis (UC)

Strata + Low Risk + High Risk

**CD**

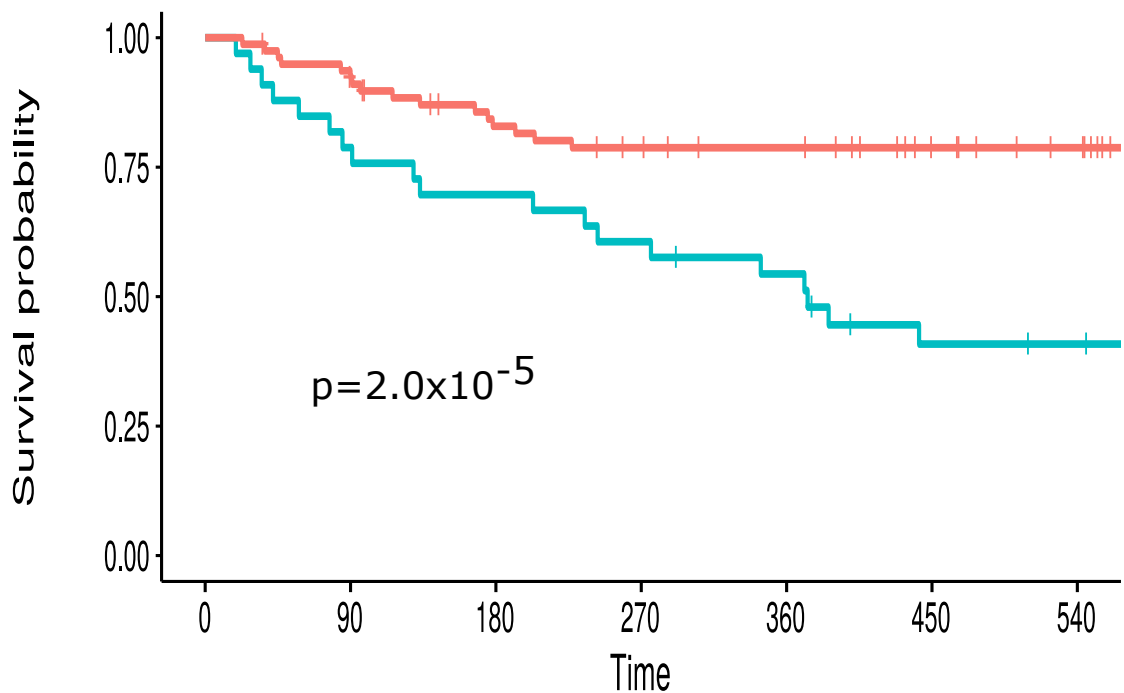

**UC**

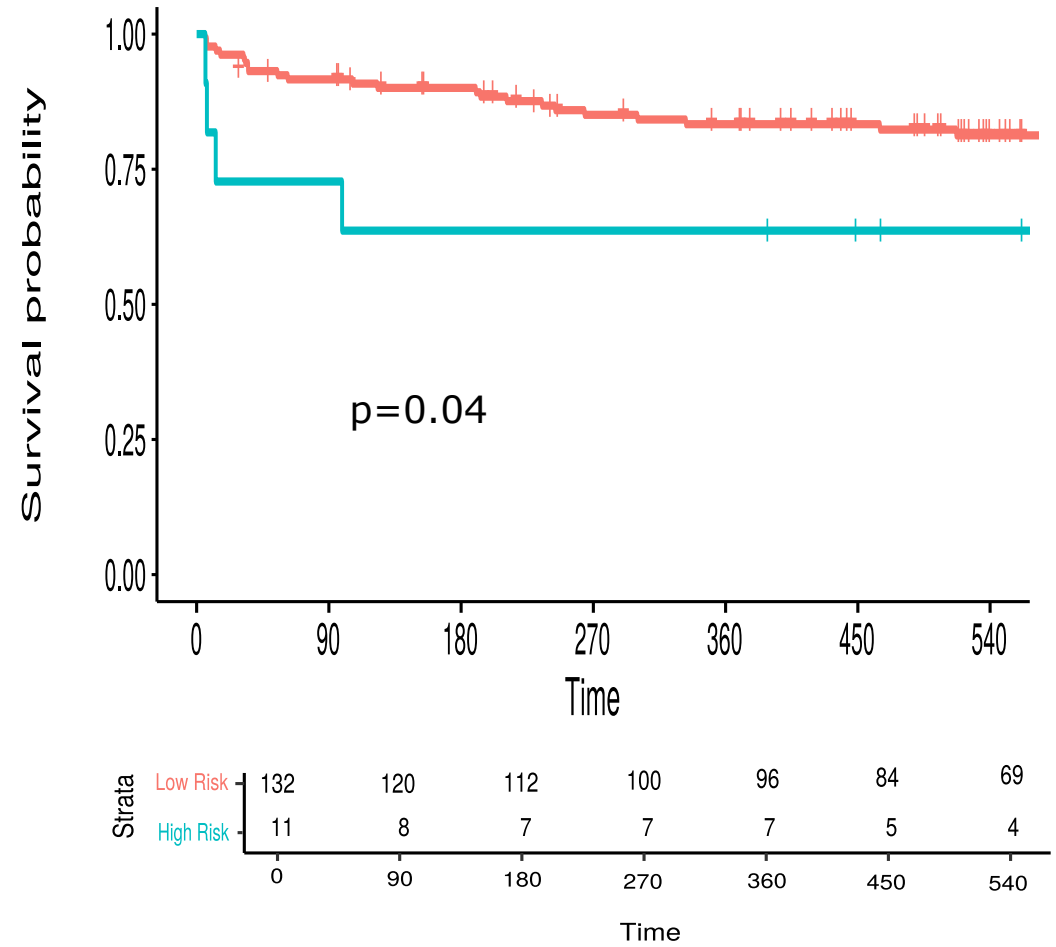

|        |           |    |    |     |     |     |     |     |
|--------|-----------|----|----|-----|-----|-----|-----|-----|
| Strata | Low Risk  | 79 | 73 | 60  | 55  | 52  | 44  | 38  |
|        | High Risk | 33 | 26 | 23  | 20  | 17  | 11  | 10  |
|        |           | 0  | 90 | 180 | 270 | 360 | 450 | 540 |

|        |           |     |     |     |     |     |     |     |
|--------|-----------|-----|-----|-----|-----|-----|-----|-----|
| Strata | Low Risk  | 132 | 120 | 112 | 100 | 96  | 84  | 69  |
|        | High Risk | 11  | 8   | 7   | 7   | 7   | 5   | 4   |
|        |           | 0   | 90  | 180 | 270 | 360 | 450 | 540 |
