# Supplementary material
Source: PubMed Central journal article supplement (PMC8095384)
Supplement: jjaa230_suppl_supplementary_figure_s6.pdf [file jjaa230_suppl_supplementary_figure_s6.pdf]

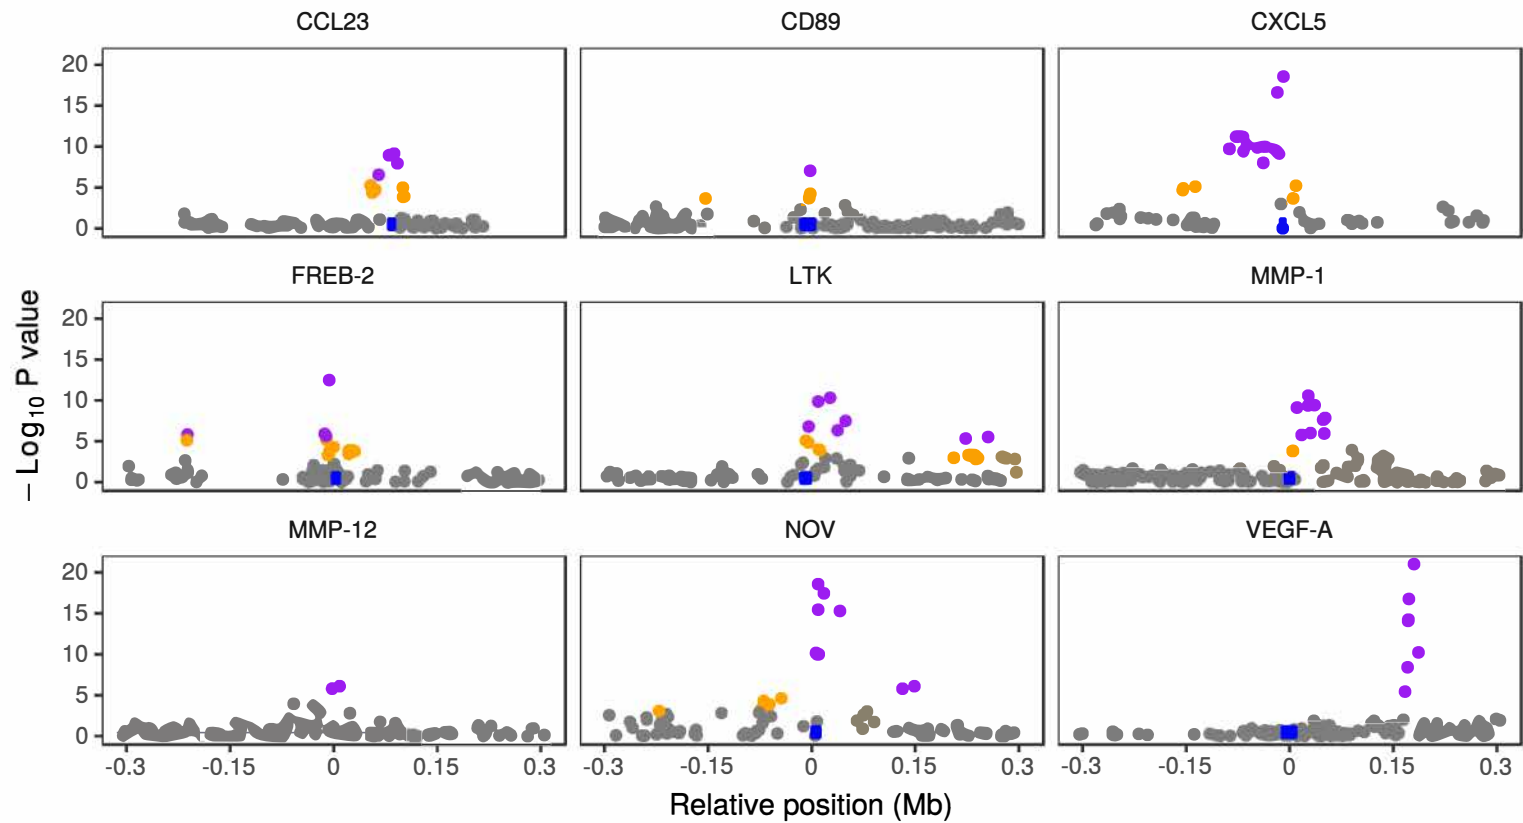

Supplementary Figure S6: Protein quantitative trait loci analysis (Diagnosis)

Significance    ● ns    ● FDR    ● Holm
