# Supplementary material
Source: PubMed Central journal article supplement (PMC8095384)
Supplement: jjaa230_suppl_supplementary_figure_s7.pdf [file jjaa230_suppl_supplementary_figure_s7.pdf]

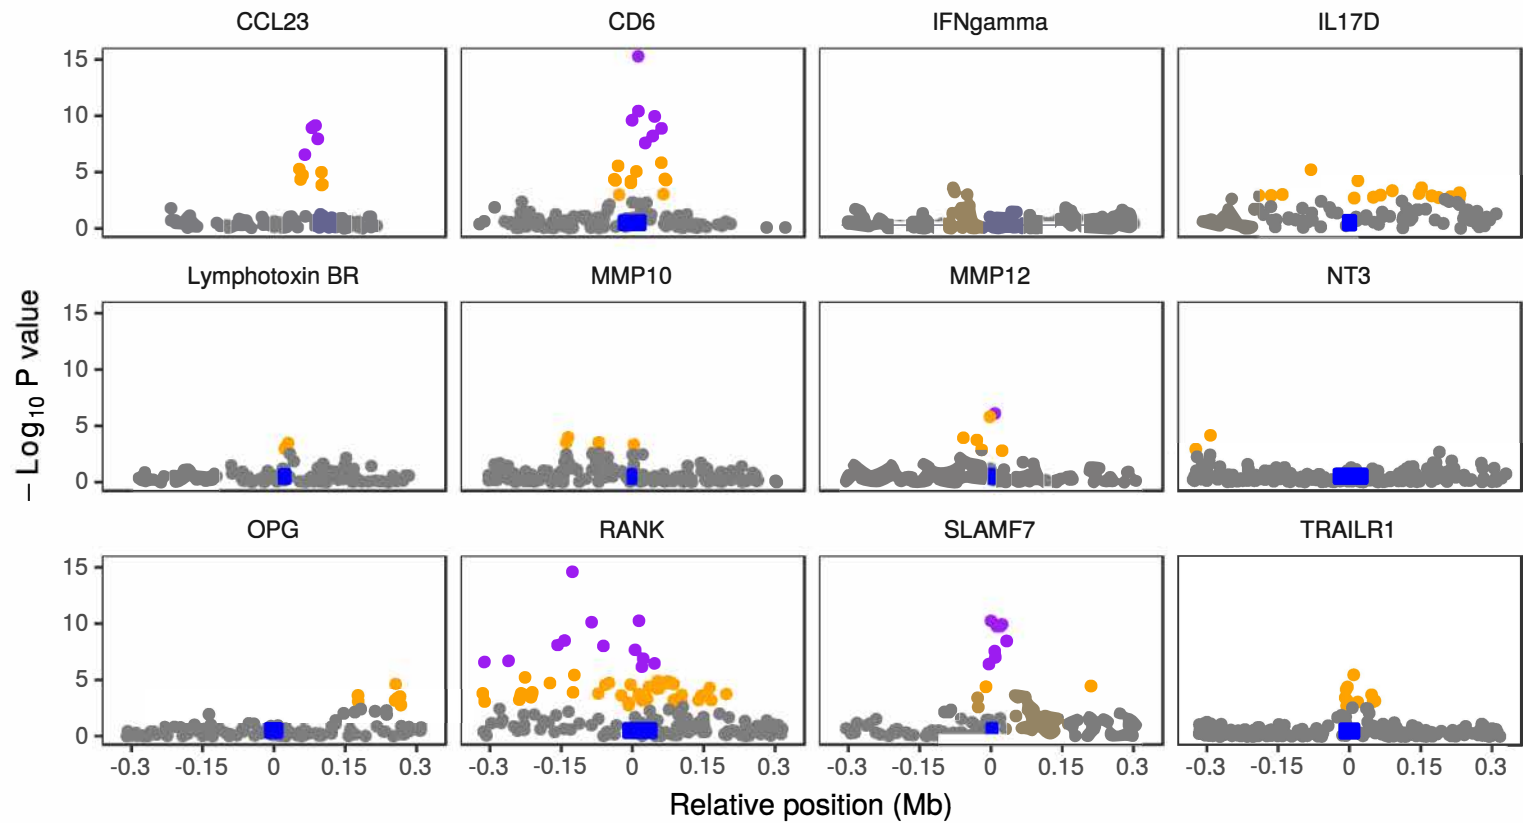

**Supplementary Figure S7:** Protein quantitative trait loci analysis (Prognosis)

Significance ● ns ● FDR ● Holm
