# Supplementary material
Source: PubMed Central journal article supplement (PMC8095384)

# Figure S1: Correlation analyses

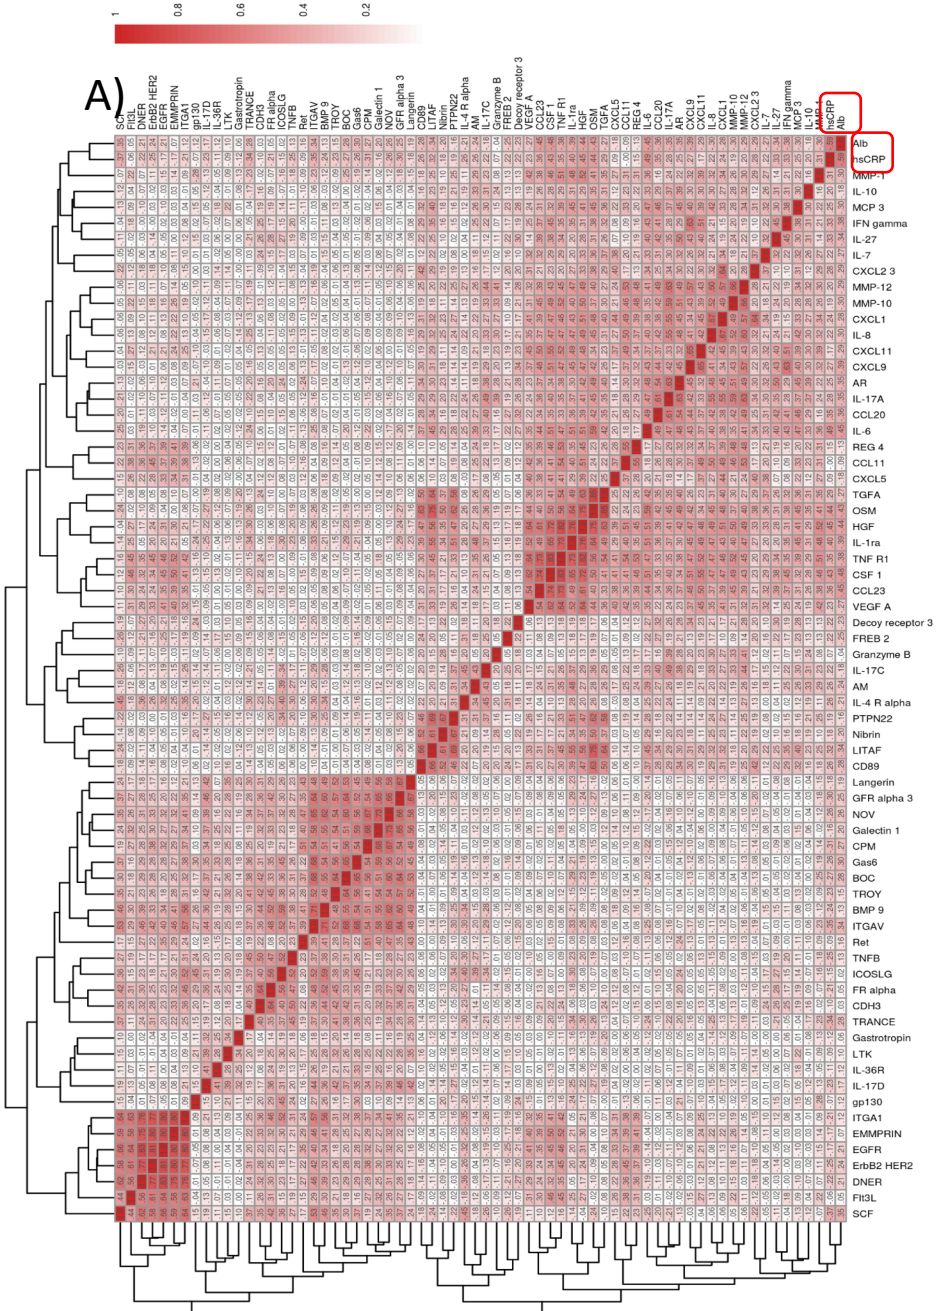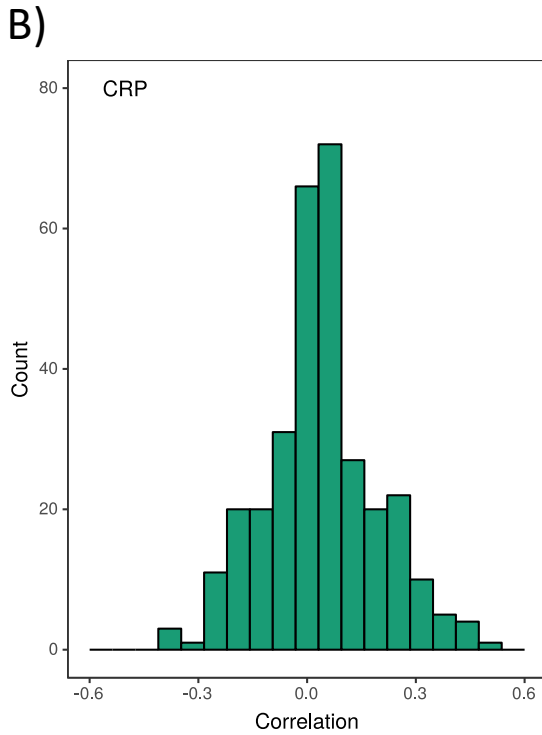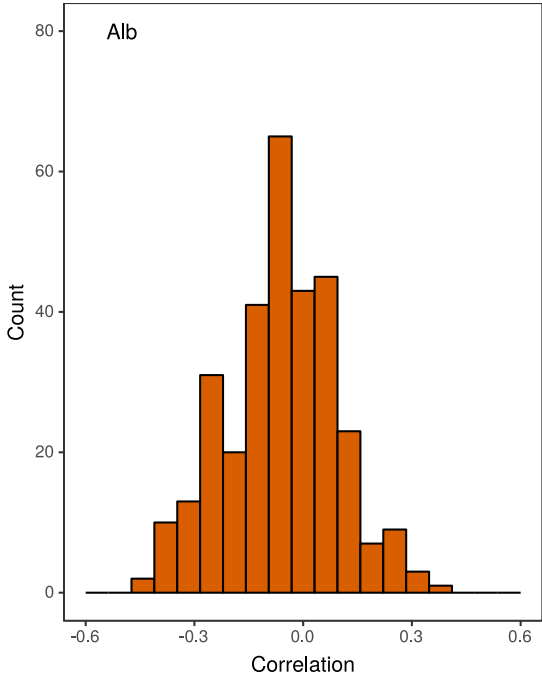

Supplement: jjaa230_suppl_supplementary_figure_s1.pdf [file jjaa230_suppl_supplementary_figure_s1.pdf]

# Supplementary Figure S2: Risk groups based on Treatment Escalation

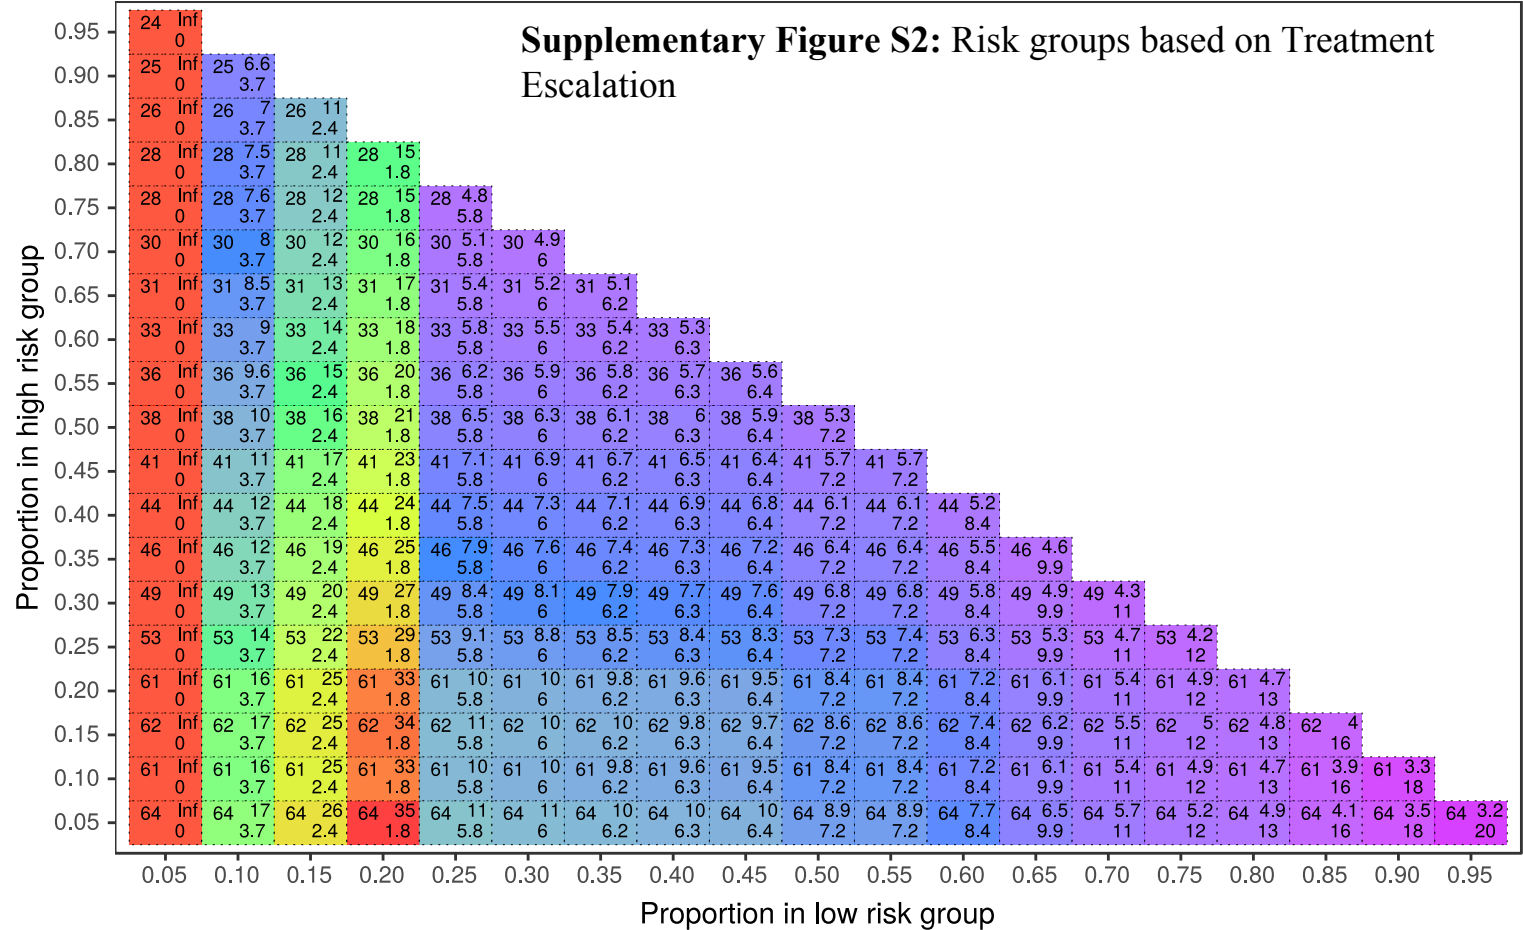

Supplement: jjaa230_suppl_supplementary_figure_s2.pdf [file jjaa230_suppl_supplementary_figure_s2.pdf]

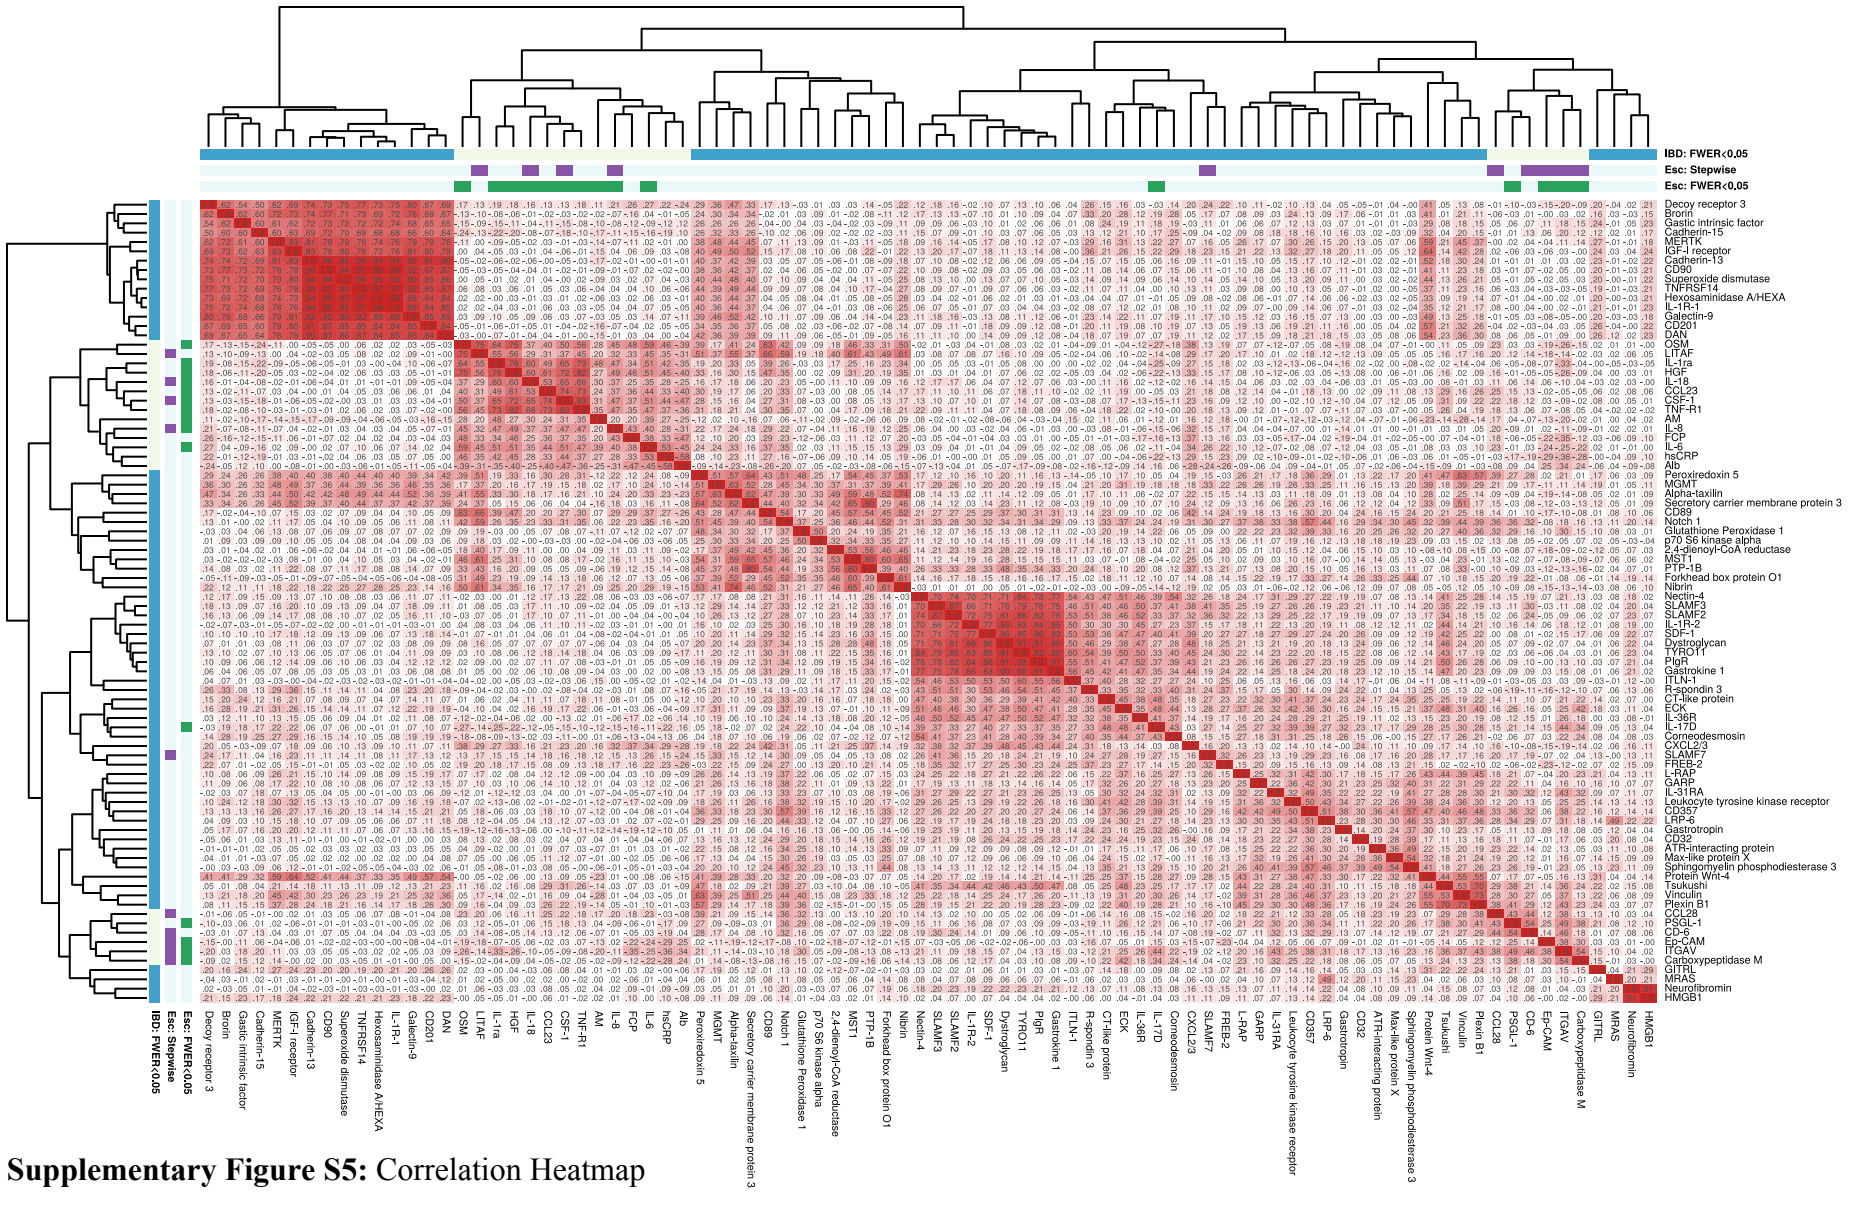

Supplementary Figure S5: Correlation Heatmap

Supplement: jjaa230_suppl_supplementary_figure_s5.pdf [file jjaa230_suppl_supplementary_figure_s5.pdf]
